# Supplementary material for: Facile synthetic route to exfoliate high quality and super-large lateral size graphene-based sheets and their applications in SERS and CO2gas sensing
Source: Royal Society of Chemistry journal article supplement (doi:10.1039/d0ra10270a), 2021-01-01
Supplement: d0ra10270a1.pdf [file d0ra10270a1.pdf]

## Supplementary information

### Facile synthetic route to exfoliate high quality and super-large lateral size of graphene-based sheets and their applications in SERS and CO<sub>2</sub> gas sensing

Ningthoujam Somorjit Singh<sup>1</sup>, Franco Mayanglambam<sup>1</sup>, Harshal B. Nemade<sup>1,2</sup>, P. K. Giri<sup>\*1,3</sup>

<sup>1</sup>Centre for Nanotechnology, Indian Institute of Technology Guwahati, Guwahati-781039, India

<sup>2</sup>Department of Electronics and Electrical Engineering, Indian Institute of Technology Guwahati, Guwahati-781039, India

<sup>3</sup>Department of Physics, Indian Institute of Technology Guwahati, Guwahati-781039, India

\*Corresponding author, Tel: +91 361 258 2703

Email address: giri@iitg.ac.in (P. K. Giri)

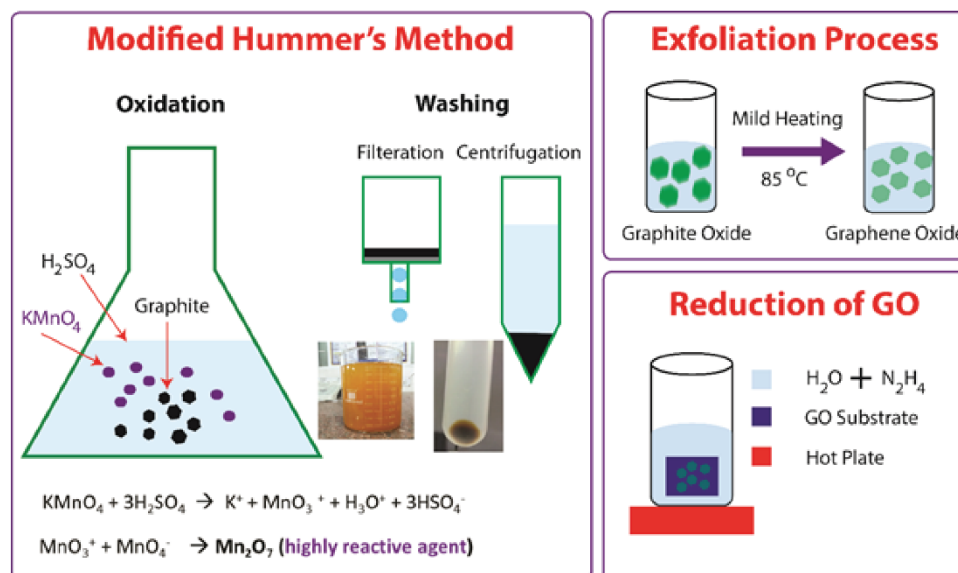

**Fig. S1.** Schematic illustration of the synthesis of super large area GO, exfoliation using mild heating, and chemical reduction to develop super large area rGO.

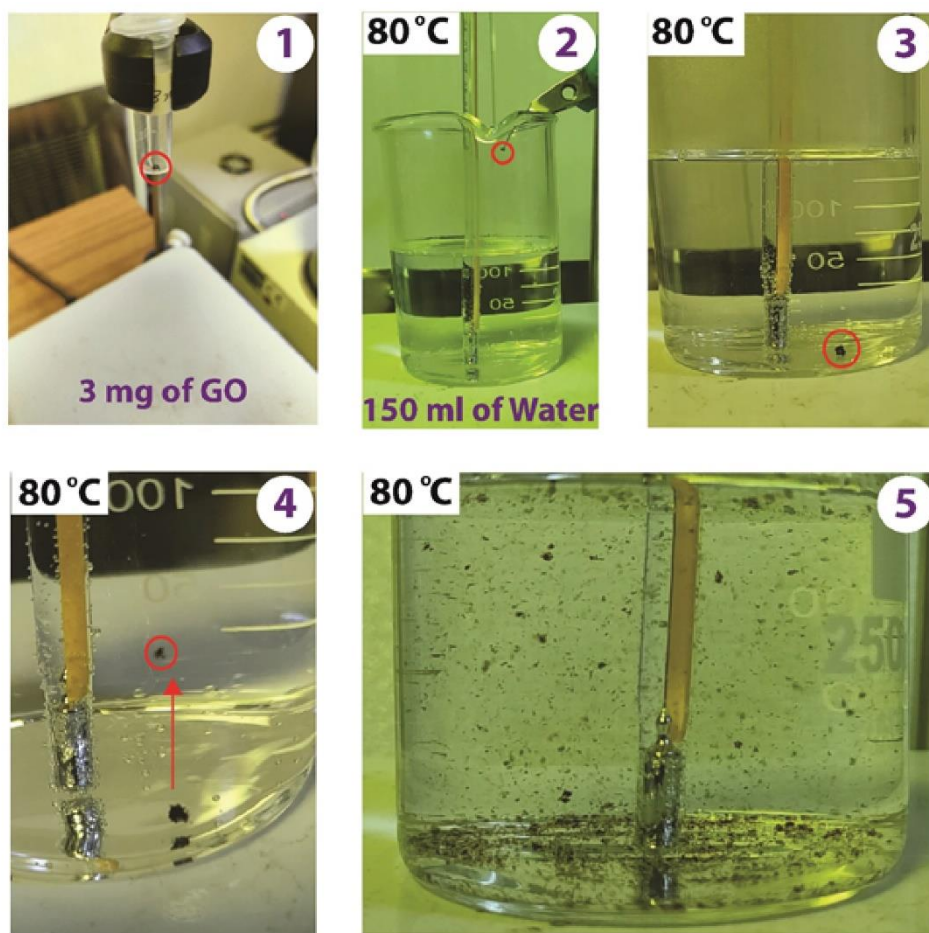

**Fig. S2.** Snapshots showing stages of exfoliation during mild heating condition. The temperature is carefully adjusted to maintain a constant value. The rise of initial exfoliated flake is observed at stage 4 driven by mild temperature. At stage 5, numerous fragmented flakes assist in mechanical exfoliation within the flakes owing to the gained kinetic energy.

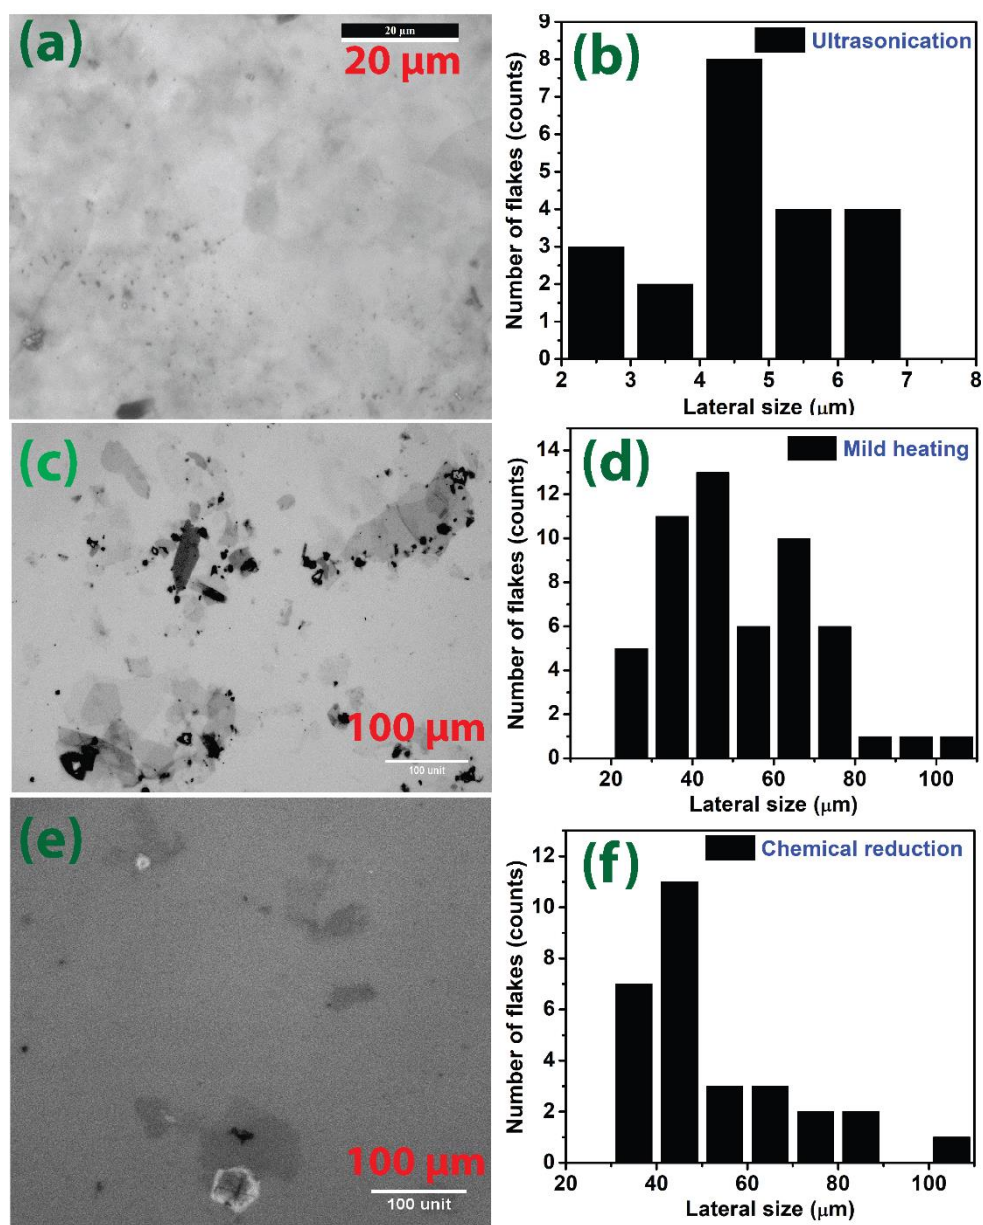

**Fig. S3.** Optical images showing various lateral sizes for (a) GO from ultrasonic exfoliation (UGO), (c) GO from mild heating exfoliation (GOO), and (e) rGO from chemical reduction. Histogram depicting statistical distribution of various lateral sizes for (b) GO exfoliation from ultrasonication, (d) GO exfoliation from mild heating, and (f) rGO from chemical reduction.

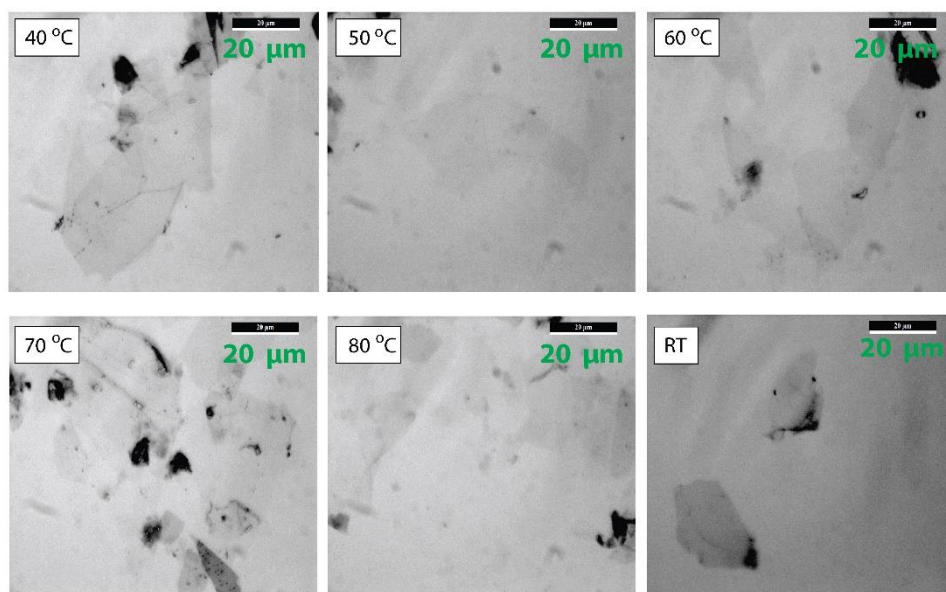

**Fig. S4.** Optical images of exfoliated GO obtained from mild heating at different temperatures (RT stands for room temperature, 23 °C). Darker patches correspond to the thicker sheets, which are not efficiently exfoliated.

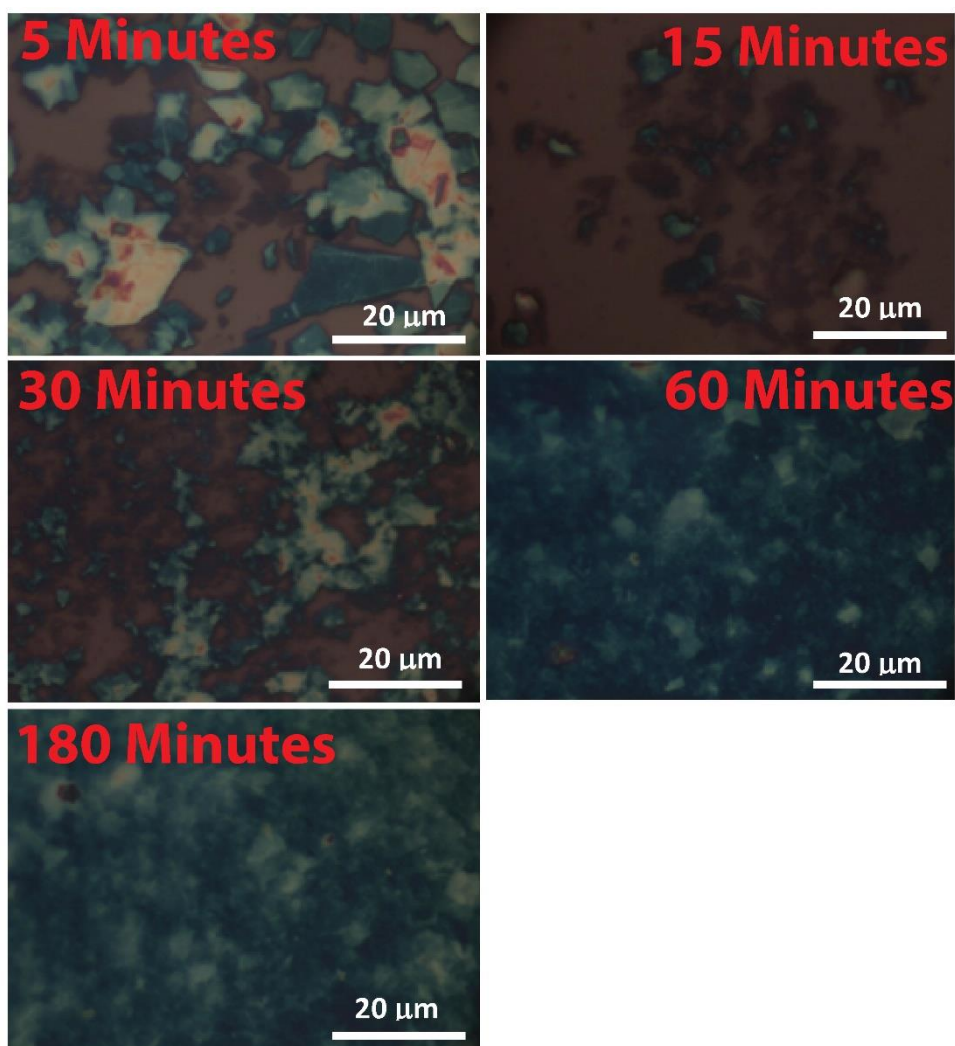

**Fig. S5.** Optical images of GO flakes obtained from exfoliation using ultrasonication at different time intervals at 50 W. Flakes fragmentation and layer exfoliation occur simultaneously wherein fragmentation predominates over exfoliation as indicated by the presence of several smaller lateral size flakes.

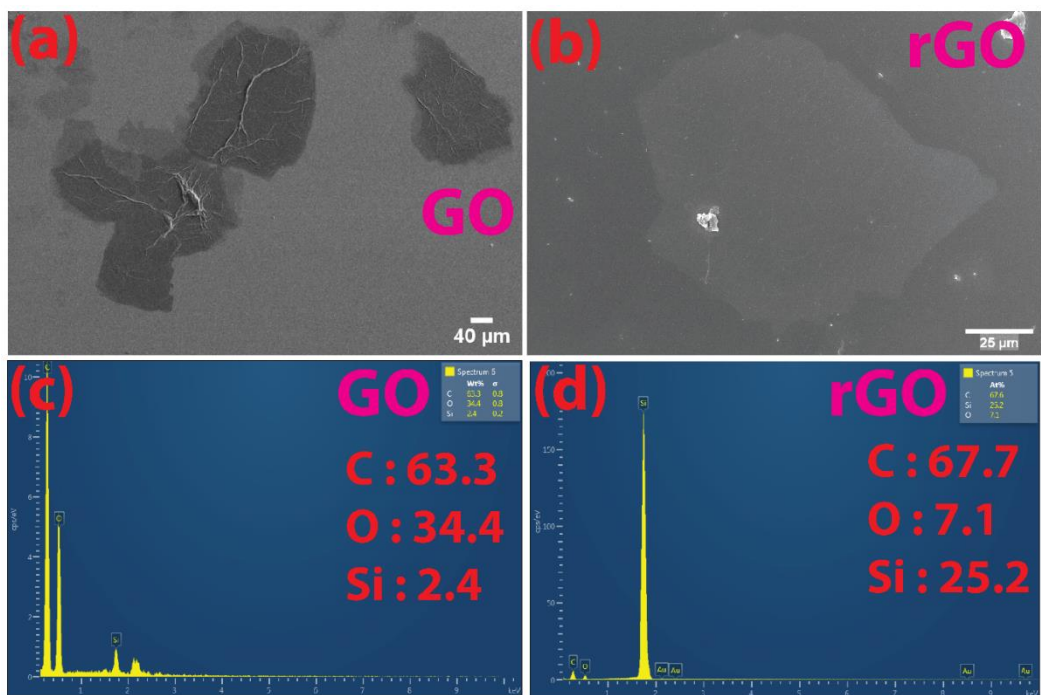

**Fig. S6.** (a) FESEM image of (a)the GO, (b) the rGO sheets; EDX elemental analysis of (c) the GO, and (d) rGO sheets.

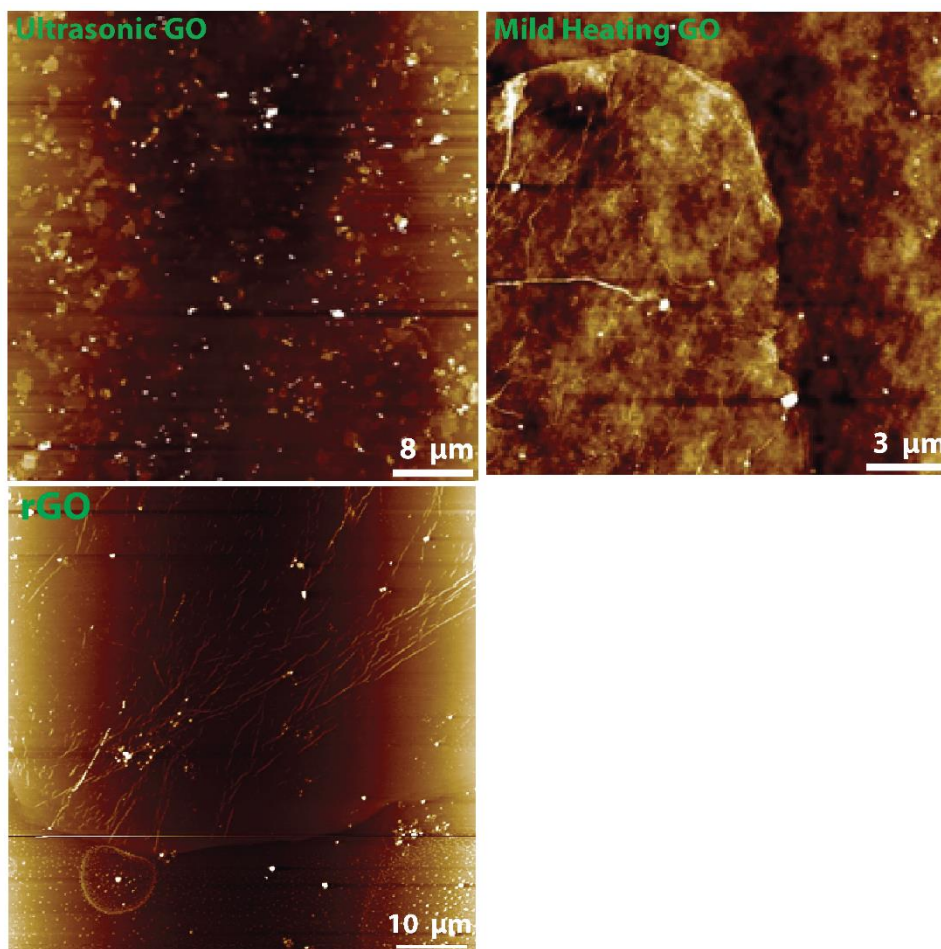

**Fig. S7.** Lower magnification AFM micrographs showing exfoliated flakes obtained using (a) ultrasonication for GO, (b) mild heating for GO and (c) chemically reduced rGO.

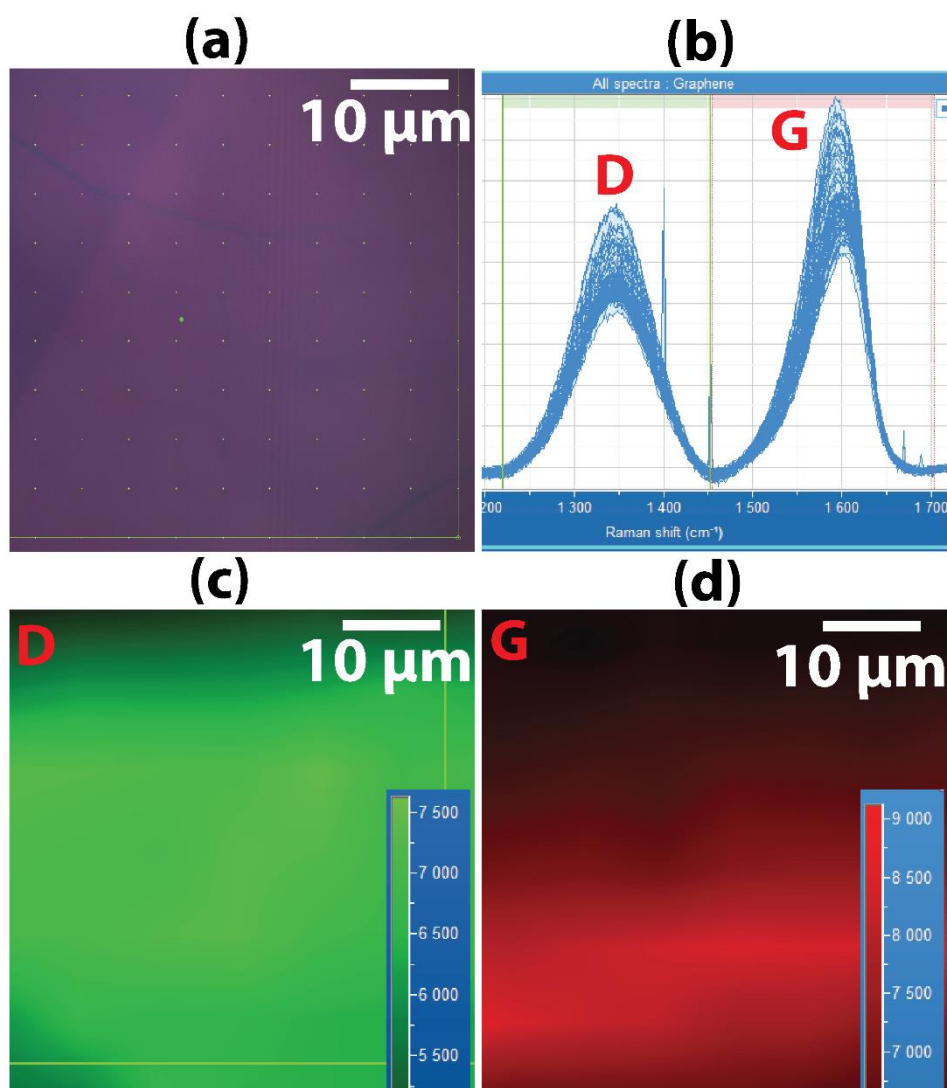

**Fig. S8.** Raman mapping spectrum on the 50 x 50  $\mu\text{m}$  size rGO sheet.



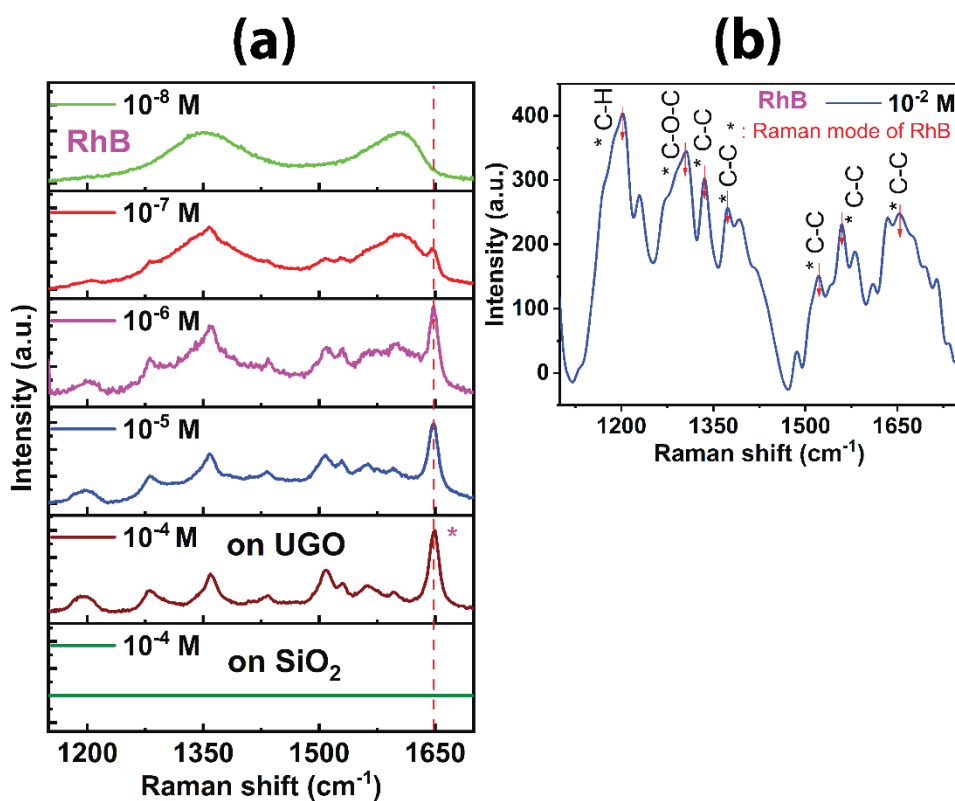

**Fig. S9.** (a) Raman spectra of different concentrations of RhB on UGO; (b) Raman spectrum of  $10^{-2}$  M concentration of RhB on  $\text{SiO}_2/\text{Si}$  substrate.

**Table S1.** Raman peak positions for RhB molecule<sup>1</sup>

| Raman Peak Position<br>( $\text{cm}^{-1}$ ) | Bond details     |
|---------------------------------------------|------------------|
| 1647                                        | C-C stretching   |
| 1595                                        | C-C stretching   |
| 1560                                        | C-C stretching   |
| 1508                                        | C-C stretching   |
| 1358                                        | C-C stretching   |
| 1281                                        | C-O-C stretching |
| 1199                                        | C-H Bending      |

During SERS technique, if different substrate samples are used with different Raman characterization parameters such as laser power and accumulation time then the formula for the enhancement factor is below,

$$EF = \frac{I_{SERS}}{I_R} \times \frac{C_R}{C_{SERS}} \times \frac{P_R}{P_{SERS}} \times \frac{T_R}{T_{SERS}}$$

Whereas,  $P_{SERS}$  is the laser excitation power in SERS measurement on GO/rGO substrate,  $T_{SERS}$  is the accumulation time of the SERS measurement on GO/rGO substrate,  $P_R$  is the laser excitation power of the Raman signal on base  $SiO_2$  substrate, and  $T_R$  is the accumulation time of the Raman signal on base  $SiO_2$  substrate.

If the volume of the sample solution is used differently in Raman characterization measurement, then the EF formula<sup>2</sup> is given below,

$$EF = \frac{I_{SERS}}{I_R} \times \frac{C_R}{C_{SERS}} \times \frac{P_R}{P_{SERS}} \times \frac{T_R}{T_{SERS}} \times \frac{N_R}{N_{SERS}}$$

Whereas,  $N_{SERS}$  is the volume of the concentration solution used for SERS signal on GO/rGO substrate, and  $N_R$  is the volume of the concentration solution used for the Raman signal on base  $SiO_2$  substrate.

**Table S2.** Raman intensity and Enhancement Factors for various substrates at different Raman shifts

| Peak position<br>( $cm^{-1}$ ) | Raman<br>intensity for<br>RhB on<br>$SiO_2$<br>substrate<br>(a.u.) | Raman<br>intensity for<br>RhB on rGO<br>substrate<br>(a.u.) | EF of rGO<br>substrate | Raman<br>intensity for<br>RhB on GO<br>substrate<br>(a.u.) | EF of GO<br>substrate |
|--------------------------------|--------------------------------------------------------------------|-------------------------------------------------------------|------------------------|------------------------------------------------------------|-----------------------|
| 1647                           | 247                                                                | 7750                                                        | 3137                   | 23423                                                      | 9482                  |
| 1596                           | 188                                                                | 3261                                                        | 1734                   | 8571                                                       | 4559                  |
| 1505                           | 150                                                                | 4829                                                        | 3219                   | 12946                                                      | 8630                  |
| 1356                           | 255                                                                | 4806                                                        | 1884                   | 12158                                                      | 4767                  |
| 1286                           | 344                                                                | 3042                                                        | 884                    | 6642                                                       | 1930                  |
| 1196                           | 403                                                                | 1474                                                        | 365                    | 4277                                                       | 790                   |

## Reference

- 1 S. Huh, J. Park, Y. S. Kim, K. S. Kim, B. H. Hong and J. M. Nam, *ACS Nano*, 2011, **5**, 9799–9806.
- 2 Y. Xu, M. P. Konrad, J. L. Trotter, C. P. McCoy and S. E. J. Bell, *Small*, , DOI:10.1002/sml.201602163.
